# Supplementary material for: R269C variant of ESR1: high prevalence and differential function in a subset of pancreatic cancers
Source: PubMed Central journal article supplement (PMC7282172; doi:10.1186/s12885-020-07005-x), 2020-06-08

# S1

A.

## PANC-1

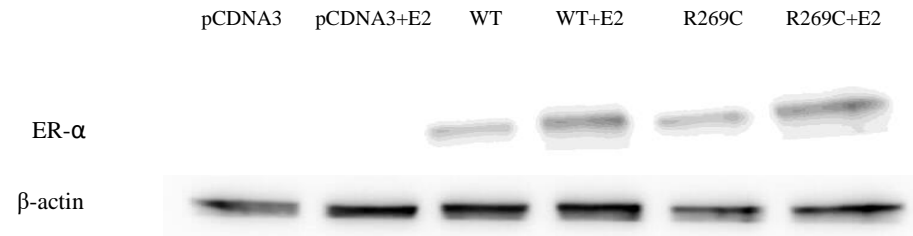

B.

## COLO-357

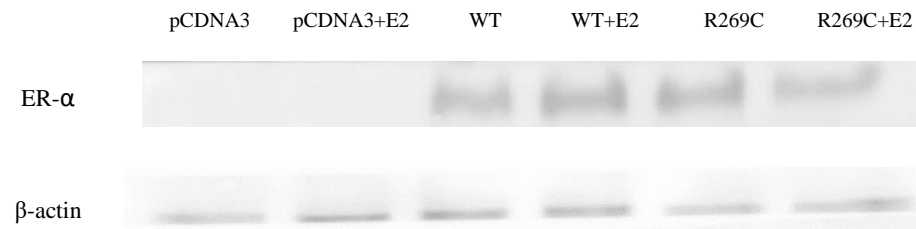

Supplement: 12885_2020_7005_MOESM1_ESM.pdf [file 12885_2020_7005_MOESM1_ESM.pdf]
