# Supplementary material for: R269C variant of ESR1: high prevalence and differential function in a subset of pancreatic cancers
Source: PubMed Central journal article supplement (PMC7282172; doi:10.1186/s12885-020-07005-x), 2020-06-08
Supplement: 12885_2020_7005_MOESM2_ESM.pdf [file 12885_2020_7005_MOESM2_ESM.pdf]

| Gene Name    | Fold change<br>(269C-ER vs<br>WT-ER) | p-value            |
|--------------|--------------------------------------|--------------------|
| LINC00221    | 9.94936                              | 1.60808E-06        |
| SNORA58      | 7.39334                              | 0.000264164        |
| LOC105371703 | 3.218                                | 0.000151507        |
| SLC10A2      | 3.00466                              | 0.000424669        |
| SPTA1        | -2.00505                             | 0.000373446        |
| CHRM4        | -2.01712                             | 0.0000460531       |
| ABCB11       | -2.0473                              | 3.64666E-08        |
| DUOX2        | -2.05579                             | 0.000496647        |
| ITGA11       | -2.20964                             | 4.70066E-05        |
| ACMSD        | -2.22023                             | 2.53598E-05        |
| LOC642366    | -2.22811                             | 0.000479502        |
| KNG1         | -2.27623                             | 2.92785E-05        |
| TLR9         | -2.34524                             | 0.000440847        |
| GSTM2        | -2.40979                             | 0.000344234        |
| LINC00706    | -2.4593                              | 0.000111491        |
| MUC17        | -2.47735                             | 4.29863E-05        |
| DHRS9        | -2.53271                             | 5.10462E-09        |
| CYTH4        | -2.62159                             | 0.00030186         |
| LINC01094    | -2.6471                              | 0.00026941         |
| SLC51B       | -2.77994                             | 4.25982E-11        |
| FGG          | -2.84082                             | 5.0933E-07         |
| OLFM4        | -3.01867                             | 4.85376E-05        |
| KLRC3        | -3.41256                             | 0.000223357        |
| GUCA2B       | -3.68262                             | 4.18267E-07        |
| SERPINA1     | -3.95624                             | 1.23465E-05        |
| CD79A        | -4.06245                             | 0.000297716        |
| OTOF         | -4.33232                             | 2.42386E-07        |
| GFRA2        | -4.40673                             | 8.89776E-05        |
| PLA2G4D      | -4.4699                              | 3.50666E-10        |
| MPPED1       | -4.49751                             | 0.000471093        |
| CPN2         | -4.80729                             | 0.000438474        |
| PRAP1        | -4.92044                             | 0.000417221        |
| MUM1L1       | -5.50334                             | 6.63633E-05        |
| CXCL14       | -5.83936                             | 7.30615E-14        |
| <b>VASN</b>  | <b>-6.03791</b>                      | <b>2.51228E-05</b> |
| HCG20        | -6.09428                             | 0.000285668        |
| HAMP         | -7.28894                             | 4.47808E-05        |
| LBP          | -7.63972                             | 9.30596E-12        |
| KCNE1        | -7.78223                             | 0.000597159        |
| CILP         | -9.73187                             | 4.15455E-13        |
| TDRG1        | -10.0774                             | 1.60887E-06        |
| LINC02016    | -10.6571                             | 2.94372E-05        |
| B3GNT6       | -13.9481                             | 8.73073E-05        |
| SLCO2A1      | -15.0136                             | 2.32404E-07        |
| CST1         | -53.8649                             | 2.4838E-10         |
