# Supplementary material for: R269C variant of ESR1: high prevalence and differential function in a subset of pancreatic cancers
Source: PubMed Central journal article supplement (PMC7282172; doi:10.1186/s12885-020-07005-x), 2020-06-08

# MCF-7

S3

# COLO-357

A.

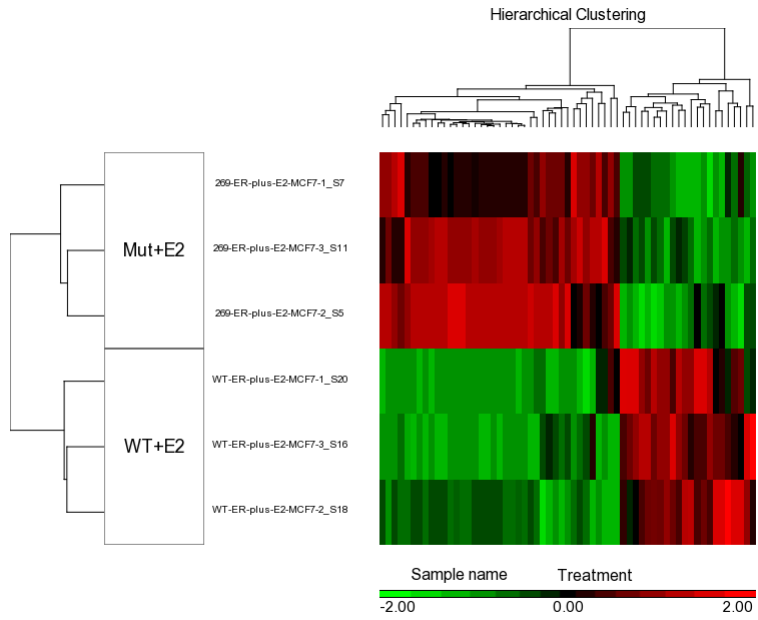

B.

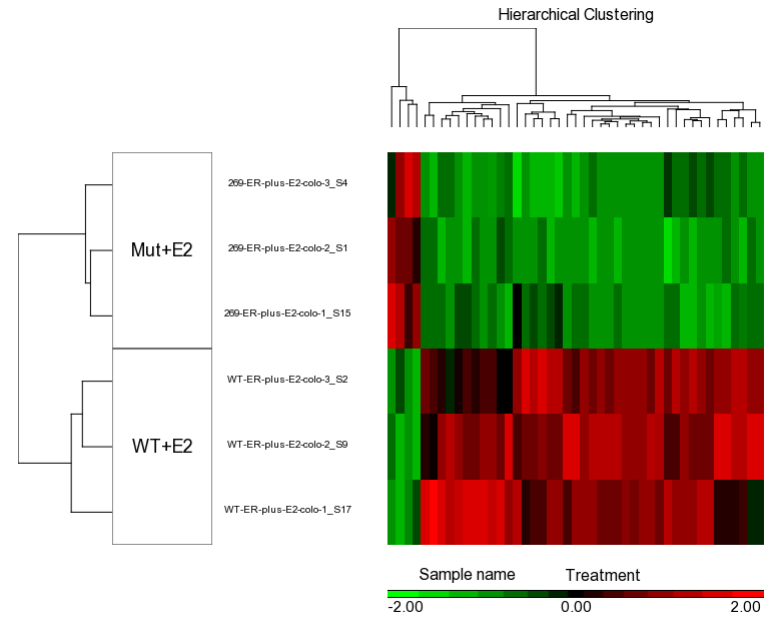

Supplement: 12885_2020_7005_MOESM3_ESM.pdf [file 12885_2020_7005_MOESM3_ESM.pdf]
